# Supplementary material
Source: HighWire-hosted journal article supplement (https://rmdopen.bmj.com/content/8/2/e002560)
Supplement: inline-supplementary-material-1 [file inline-supplementary-material-1.pdf]

| <b>Supplementary Table S1.</b> Comorbidities identified in the Danish National Patient Registry                                                                                                                                                                                                                                                                                |                                                                                                                                                                                                                                                                                                                                                                                                                                                                                                                                                                     |                                                                                                                                 |
|--------------------------------------------------------------------------------------------------------------------------------------------------------------------------------------------------------------------------------------------------------------------------------------------------------------------------------------------------------------------------------|---------------------------------------------------------------------------------------------------------------------------------------------------------------------------------------------------------------------------------------------------------------------------------------------------------------------------------------------------------------------------------------------------------------------------------------------------------------------------------------------------------------------------------------------------------------------|---------------------------------------------------------------------------------------------------------------------------------|
| <b>Disease</b>                                                                                                                                                                                                                                                                                                                                                                 | <b>ICD-10 codes*</b>                                                                                                                                                                                                                                                                                                                                                                                                                                                                                                                                                | <b>ICD-8 codes*</b>                                                                                                             |
| Malignancy                                                                                                                                                                                                                                                                                                                                                                     | All except benign tumors<br>(Any tumor: C00-C43, C45-C75, Metastatic solid tumor: C76-80, Lymphoma: C81-C85, C88, C90, C96, Leukemia: C91-C95)                                                                                                                                                                                                                                                                                                                                                                                                                      | All except benign tumors<br>(Any tumor: 140-194, Metastatic solid tumor: 195-199, Lymphoma: 200-203; 275.59, Leukemia: 204-207) |
| Infection                                                                                                                                                                                                                                                                                                                                                                      | A00-B99, D73.3, E06.0, E32.1, G00-G02, G04.2, G05-G07, H00.0, H44.0, H60.0-H60.3, H66-H67, H70, I30.1, I40.0, J00-J22, J32, J34.0, J36, J38.3, J39.0-J39.1, J44.0, J85, J86, K04.4, K04.6, K04.7, K10.2, K11.3, K12.2, K14.0, K57.0, K57.2, K57.4, K57.8, K61, K63.0, K65.0, K65.1, K65.2, K65.9, L00-L08, L30.3, M00-M01, M46.2-M46.5, M60.0, M65.0, M71.0, M71.1, M72.6, M86, N10, N11, N12, N13.6, N15.1, N15.9, N30.0 N30.8, N34.0, N39.0, N41.2, N43.1, N45.2, N45.3, N45.4, N48.2, N61, N70, N73, N75.1, O23, O26.4, O41.1, O75.3, O85, O86, O88.3, O91, O98; | -                                                                                                                               |
| Knee or hip prosthesis                                                                                                                                                                                                                                                                                                                                                         | S: NGB, NFB                                                                                                                                                                                                                                                                                                                                                                                                                                                                                                                                                         | -                                                                                                                               |
| Chronic pulmonary disease                                                                                                                                                                                                                                                                                                                                                      | J40-J47; J60-J67; J68.4; J70.1; J70.3; J84.1; J92.0; J96.1; J98.2; J98.3                                                                                                                                                                                                                                                                                                                                                                                                                                                                                            | -                                                                                                                               |
| Diabetes                                                                                                                                                                                                                                                                                                                                                                       | E10-E14, O24                                                                                                                                                                                                                                                                                                                                                                                                                                                                                                                                                        | -                                                                                                                               |
| Myocardial infarction                                                                                                                                                                                                                                                                                                                                                          | I20.0, I21, I22                                                                                                                                                                                                                                                                                                                                                                                                                                                                                                                                                     | -                                                                                                                               |
| Chronic kidney disease                                                                                                                                                                                                                                                                                                                                                         | I12, I13; N00-N05; N07; N11; N14; N18-N19; Q61                                                                                                                                                                                                                                                                                                                                                                                                                                                                                                                      | -                                                                                                                               |
| *ICD: International Statistical Classification of Diseases and Related Health Problems; according to list by the World Health Organization (WHO). Both in- and outpatient contacts were included from the establishment of the registry in 1976. Time window applied was 0-10 years prior to baseline for all disease, and ever for malignancy. Datacut was by August 10, 2018 |                                                                                                                                                                                                                                                                                                                                                                                                                                                                                                                                                                     |                                                                                                                                 |

Supplementary Table S2. Available baseline data for the study population, stratified by previous originator treatment history and indication

|                                               | Originator-naïve switchers<br>N=1,171 |           |           | Originator-experienced switchers<br>N=434 |          |           |
|-----------------------------------------------|---------------------------------------|-----------|-----------|-------------------------------------------|----------|-----------|
|                                               | RA*                                   | PsA       | AxSpA     | RA*                                       | PsA      | AxSpA     |
| <b>Number of patients, n</b>                  | 482                                   | 244       | 445       | 203                                       | 70       | 161       |
| Gender, n (%)                                 | 482 (100)                             | 244 (100) | 445 (100) | 203 (100)                                 | 70 (100) | 161 (100) |
| Age, n (%)                                    | 482 (100)                             | 244 (100) | 445 (100) | 203 (100)                                 | 70 (100) | 161 (100) |
| Disease duration, n (%)                       | 469 (97)                              | 223 (91)  | 425 (96)  | 194 (96)                                  | 68 (97)  | 159 (99)  |
| BMI, n (%)                                    | 226 (47)                              | 103 (42)  | 175 (39)  | 171 (84)                                  | 58 (83)  | 140 (87)  |
| Smoking status, n (%)                         | 482 (100)                             | 243 (99)  | 441 (99)  | 201 (99)                                  | 70 (100) | 160 (99)  |
| Year of originator treatment start, n (%)     | -                                     | -         | -         | 203 (100)                                 | 70 (100) | 161 (100) |
| Prior originator treatment duration, n (%)    | -                                     | -         | -         | 203 (100)                                 | 70 (100) | 161 (100) |
| Prior CT-P13 treatment duration, n (%)        | 482 (100)                             | 244 (100) | 445 (100) | 203 (100)                                 | 70 (100) | 161 (100) |
| Concomitant MTX, n (%)                        | 482 (100)                             | 244 (100) | 445 (100) | 203 (100)                                 | 70 (100) | 161 (100) |
| Prior non-infliximab bDMARD treatments, n (%) | 482 (100)                             | 244 (100) | 445 (100) | 203 (100)                                 | 70 (100) | 161 (100) |
| Visits during one-year follow-up              | 473 (98)                              | 240 (98)  | 440 (99)  | 195 (96)                                  | 67 (96)  | 157 (98)  |
| <b>Disease activity</b>                       |                                       |           |           |                                           |          |           |
| In DAS28/ASDAS remission (yes/no), n (%)      | 363 (75)                              | 196 (80)  | 370 (83)  | 150 (74)                                  | 53 (76)  | 135 (84)  |
| In CDAI/ASDAS remission (yes/no), n (%)       | 389 (81)                              | 186 (76)  | 370 (83)  | 157 (77)                                  | 51 (73)  | 136 (84)  |
| CRP, n (%)                                    | 422 (88)                              | 213 (87)  | 393 (88)  | 169 (83)                                  | 59 (84)  | 144 (89)  |
| DAS28, n (%)                                  | 397 (82)                              | 196 (80)  | -         | 161 (79)                                  | 56 (80)  | -         |
| CDAI, n (%)                                   | 389 (81)                              | 186 (76)  | -         | 157 (77)                                  | 51 (73)  | -         |
| BASDAI, n (%)                                 | -                                     | -         | 382 (86)  | -                                         | -        | 142 (88)  |
| BASFI, n (%)                                  | -                                     | -         | 373 (84)  | -                                         | -        | 138 (86)  |
| ASDAS, n (%)                                  | -                                     | -         | 370 (83)  | -                                         | -        | 135 (84)  |
| Swollen joint count, n (%)                    | 423 (88)                              | 204 (84)  | 230 (52)  | 172 (85)                                  | 58 (83)  | 85 (53)   |
| Tender joint count, n (%)                     | 424 (88)                              | 206 (84)  | 234 (53)  | 171 (85)                                  | 58 (83)  | 85 (53)   |
| Physician global VAS, n (%)                   | 407 (84)                              | 196 (80)  | 228 (51)  | 162 (80)                                  | 53 (76)  | 74 (46)   |
| Patient pain VAS, n (%)                       | 423 (88)                              | 216 (89)  | 395 (89)  | 175 (86)                                  | 61 (87)  | 144 (89)  |
| Patient fatigue VAS, n (%)                    | 420 (87)                              | 215 (89)  | 393 (88)  | 175 (86)                                  | 61 (87)  | 143 (89)  |
| Patient global VAS, n (%)                     | 424 (88)                              | 216 (89)  | 396 (89)  | 178 (88)                                  | 61 (87)  | 144 (89)  |
| HAQ, n (%)                                    | 417 (87)                              | 217 (89)  | 376 (85)  | 173 (85)                                  | 60 (86)  | 141 (88)  |
| PASS, n (%)                                   | 405 (84)                              | 210 (86)  | 380 (85)  | 169 (83)                                  | 60 (86)  | 138 (86)  |
| <b>Comorbidities***</b>                       |                                       |           |           |                                           |          |           |
| Cancer, n (%)                                 | 482 (100)                             | 244 (100) | 445 (100) | 203 (100)                                 | 70 (100) | 161 (100) |
| Hospitalized infection, n (%)                 | 482 (100)                             | 244 (100) | 445 (100) | 203 (100)                                 | 70 (100) | 161 (100) |
| Knee/hip prosthesis, n (%)                    | 482 (100)                             | 244 (100) | 445 (100) | 203 (100)                                 | 70 (100) | 161 (100) |

|                               |           |           |           |           |          |           |
|-------------------------------|-----------|-----------|-----------|-----------|----------|-----------|
| Pulmonary disease, n (%)      | 482 (100) | 244 (100) | 445 (100) | 203 (100) | 70 (100) | 161 (100) |
| Diabetes, n (%)               | 482 (100) | 244 (100) | 445 (100) | 203 (100) | 70 (100) | 161 (100) |
| Myocardial infarction, n (%)  | 482 (100) | 244 (100) | 445 (100) | 203 (100) | 70 (100) | 161 (100) |
| Chronic kidney disease, n (%) | 482 (100) | 244 (100) | 445 (100) | 203 (100) | 70 (100) | 161 (100) |

| Supplementary Table S3. Baseline characteristics of all switch patients stratified by indication |                  |                  |                  |
|--------------------------------------------------------------------------------------------------|------------------|------------------|------------------|
| Total switch cohort<br>N=1,605                                                                   |                  |                  |                  |
|                                                                                                  | RA               | PsA              | AxSpA            |
| <b>Number of patients, n</b>                                                                     | 685              | 314              | 606              |
| Female, n (%)                                                                                    | 474 (69)         | 153 (49)         | 191 (32)         |
| Age, years                                                                                       | 61 (50-70)       | 52 (41-60)       | 45 (35-54)       |
| Disease duration, years                                                                          | 11 (5-19)        | 9 (5-15)         | 6 (3-14)         |
| 0-5 years, n (%)                                                                                 | 178 (27)         | 82 (28)          | 266 (46)         |
| >5 years, n (%)                                                                                  | 485 (73)         | 209 (72)         | 318 (54)         |
| BMI, kg/m <sup>2</sup>                                                                           | 24.9 (22.2-28.9) | 27.3 (23.8-30.4) | 25.7 (22.9-28.4) |
| Current smoking, n (%)                                                                           | 161 (24)         | 62 (20)          | 174 (29)         |
| Prior originator treatment duration, years                                                       | -                | -                | -                |
| Prior CT-P13 treatment duration, years                                                           | -                | -                | -                |
| Concomitant MTX, n (%)                                                                           | 517 (75)         | 182 (58)         | 85 (14)          |
| Prior non-infliximab bDMARD treatments, n (%)                                                    |                  |                  |                  |
| 0                                                                                                | 458 (67)         | 214 (68)         | 427 (70)         |
| 1                                                                                                | 121 (18)         | 59 (19)          | 90 (15)          |
| ≥2                                                                                               | 106 (15)         | 41 (13)          | 89 (15)          |
| Visits during one-year follow-up                                                                 | 3 (2-6)          | 3 (2-6)          | 3 (2-6)          |
| <b>Disease activity</b>                                                                          |                  |                  |                  |
| In DAS28/ASDAS remission**, n (%)                                                                | 338 (49)         | 178 (57)         | 184 (30)         |
| In CDAI/ASDAS remission***, n (%)                                                                | 279 (41)         | 129 (41)         | 184 (30)         |
| CRP, mg/L                                                                                        | 3 (1-5)          | 2 (1-4)          | 2 (1-4)          |
| DAS28                                                                                            | 2.2 (1.6-2.9)    | 2.1 (1.7-5.7)    | -                |
| CDAI                                                                                             | 4.8 (1.9-8.4)    | 4.7 (2.0-9.1)    | -                |
| BASDAI, mm                                                                                       | -                | -                | 26 (12-47)       |
| BASFI                                                                                            | -                | -                | 21 (9-45)        |
| ASDAS                                                                                            | -                | -                | 1.7 (1.0-2.7)    |
| Physician global VAS, mm                                                                         | 5 (2-11)         | 5 (2-11)         | 4 (1-9)          |
| Patient pain VAS, mm                                                                             | 26 (10-48)       | 28 (9-56)        | 22 (8-47)        |
| Patient fatigue VAS, mm                                                                          | 40 (18-67)       | 45 (18-73)       | 40 (16-67)       |
| Patient global VAS, mm                                                                           | 32 (11-56)       | 34 (14-65)       | 25 (10-53)       |
| HAQ                                                                                              | 0.6 (0.1-1.1)    | 0.6 (0.1-1.1)    | 0.4 (0.0-0.8)    |
| PASS yes, n (%)                                                                                  | 408 (60)         | 178 (57)         | 371 (61)         |
| <b>Comorbidities***</b>                                                                          |                  |                  |                  |
| Cancer, n (%)                                                                                    | 15 (22)          | 11 (4)           | 10 (2)           |
| Hospitalized infection, n (%)                                                                    | 196 (29)         | 77 (25)          | 116 (20)         |
| Knee/hip prosthesis, n (%)                                                                       | 71 (10)          | 15 (5)           | 17 (3)           |
| Pulmonary disease, n (%)                                                                         | 44 (6)           | 17 (5)           | 15 (2)           |
| Diabetes, n (%)                                                                                  | 40 (6)           | 21 (7)           | 20 (3)           |
| Myocardial infarction, n (%)                                                                     | 17 (2)           | 5 (2)            | 7 (1)            |
| Chronic kidney disease, n (%)                                                                    | 12 (2)           | <5               | <5               |

Numbers are median (interquartile ranges) unless otherwise stated. Baseline is in time-window -90 days to +6 days according to switch date. \*Also includes patients with Juvenile RA, polyarthritis, reactive arthritis and other arthritis. \*\*DAS28/ASDAS remission defined as DAS28 <2.6 (RA, PsA), ASDAS <1.3 (AxSpA). \*\*\* CDAI remission defined as <2.9 (RA, PsA) \*\*\* 0-10 years prior to baseline and ever for cancer. ASDAS: Ankylosing Spondylitis Disease Activity Score; BASDAI: Bath Ankylosing Spondylitis (BAS) Disease Activity Index (0-100); BASFI: BAS Functional Index (0-100); CRP: C-reactive protein; CDAI: Clinical Disease Activity Index; DAS-28: Disease activity score (4 variables); HAQ: Health assessment Questionnaire (0-3); MTX: Methotrexate; PASS: Patient Acceptable Symptom State (yes/no); Patient pain (VAS 0-100), fatigue (VAS 0-100), patient global assessment (VAS 0-100), and physician global VAS (visual analog scale [VAS], 0-100). For patient discretion, numbers below 5 are not presented.

**Supplementary Figure 1A.** Kaplan-Meier plots of crude treatment retention rates among originator-naïve switchers (stratified by indication)

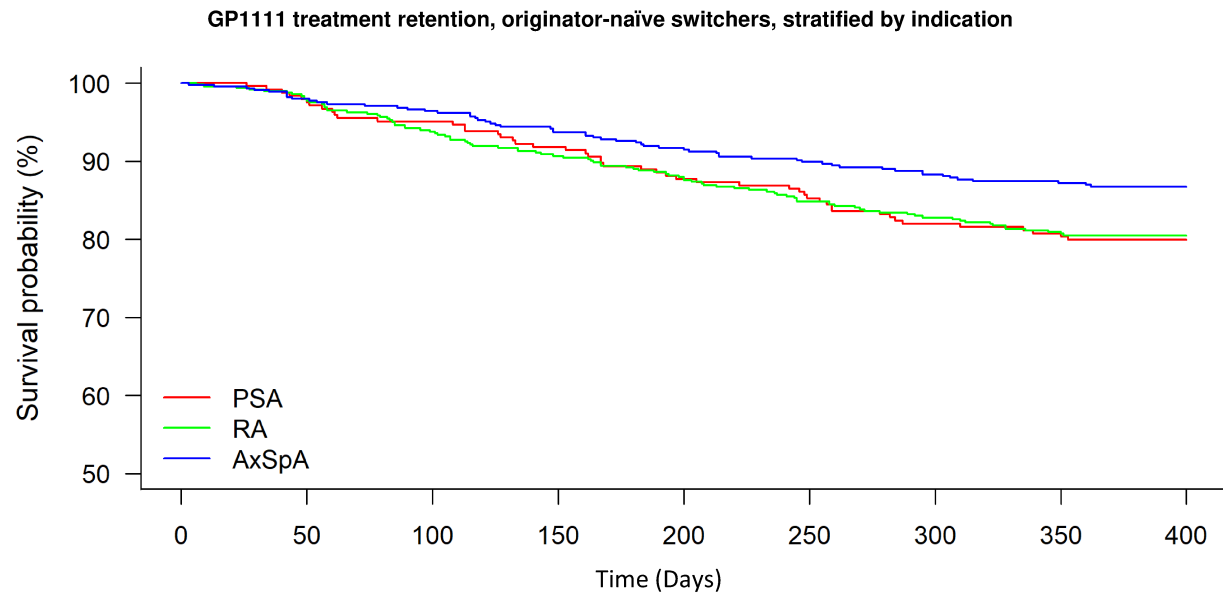

|                                        | Day 0                 | Day 180            | Day 365            |
|----------------------------------------|-----------------------|--------------------|--------------------|
| <b>Rheumatoid Arthritis (RA)</b>       |                       |                    |                    |
| No. at risk                            | 482                   | 430                | 388                |
| No. of events                          | 0                     | 52                 | 94                 |
| Retention (95% CI)                     | 100.0% (100.0-100.0%) | 89.0% (86.2-91.8%) | 80.5% (77.0-84.0%) |
| <b>Psoriasis Arthritis (PsA)</b>       |                       |                    |                    |
| No. at risk                            | 244                   | 218                | 195                |
| No. of events                          | 0                     | 26                 | 49                 |
| Retention (95% CI)                     | 100.0% (100.0-100.0%) | 89.3% (85.5-93.2%) | 79.9% (74.9-84.9%) |
| <b>Axial Spondyloarthritis (AxSpA)</b> |                       |                    |                    |
| No. at risk                            | 445                   | 412                | 386                |
| No. of events                          | 0                     | 33                 | 59                 |
| Retention (95% CI)                     | 100.0% (100.0-100.0%) | 92.6% (90.1-95.0%) | 86.7% (83.7-89.9%) |

**Supplementary Figure 1B.** Kaplan-Meier plots of crude treatment retention rates among originator-experienced switchers (stratified by indication)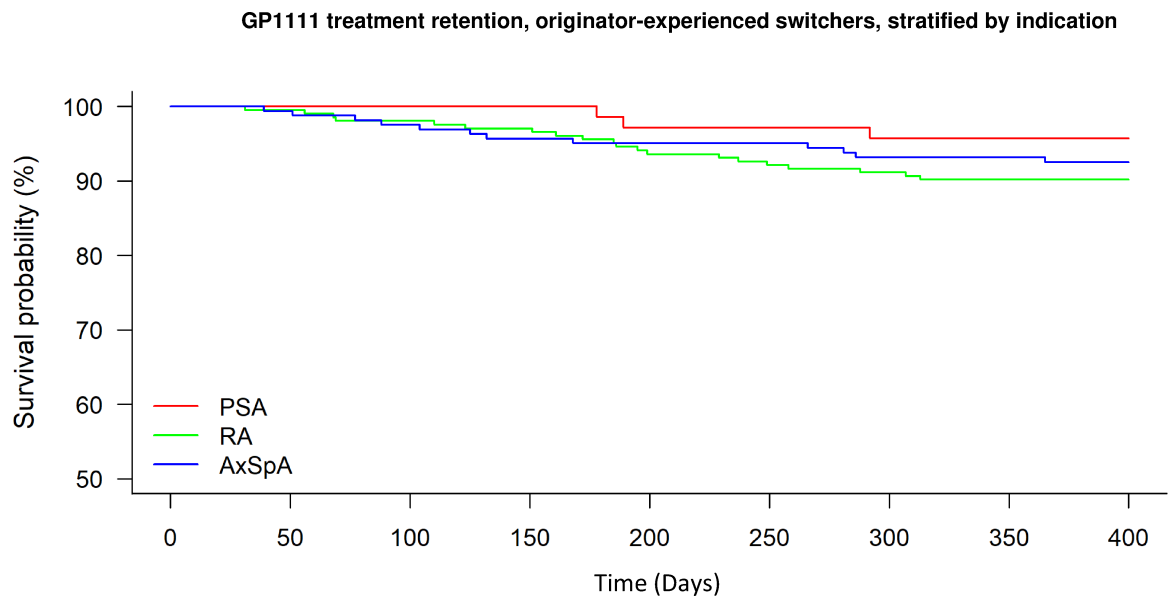

|                                        | Day 0                 | Day 180             | Day 365             |
|----------------------------------------|-----------------------|---------------------|---------------------|
| <b>Rheumatoid Arthritis (RA)</b>       |                       |                     |                     |
| No. at risk                            | 203                   | 194                 | 183                 |
| No. of events                          | 0                     | 9                   | 20                  |
| Retention (95% CI)                     | 100.0% (100.0-100.0%) | 95.6% (92.7-98.4%)  | 90.1% (86.0-94.2%)  |
| <b>Psoriasis Arthritis (PsA)</b>       |                       |                     |                     |
| No. at risk                            | 70                    | 69                  | 67                  |
| No. of events                          | 0                     | 1                   | 3                   |
| Retention (95% CI)                     | 100.0% (100.0-100.0%) | 98.6% (95.8-100.0%) | 95.7% (91.0-100.0%) |
| <b>Axial Spondyloarthritis (AxSpA)</b> |                       |                     |                     |
| No. at risk                            | 161                   | 153                 | 150                 |
| No. of events                          | 0                     | 8                   | 11                  |
| Retention (95% CI)                     | 100.0% (100.0-100.0%) | 95.0% (91.7-98.4%)  | 92.5% (88.5-96.6%)  |
